# Supplementary material for: Effect of a monovalent salt on the energetics of an antimicrobial-peptide: micelle dissociation
Source: Royal Society of Chemistry journal article supplement (doi:10.1039/d2cp02735f), 2022-01-01
Supplement: d2cp02735f1.pdf [file d2cp02735f1.pdf]

## Supporting Information

### Effect of Monovalent Salt on the Energetics of Antimicrobial-Peptide: Micelle Dissociation

Suvankar Ghosh,<sup>1</sup> Sunanda Chatterjee,<sup>2\*</sup> Priyadarshi Satpati<sup>1\*</sup>

*<sup>1</sup>Department of Biosciences and Bioengineering, Indian Institute of Technology Guwahati,  
Guwahati 781039, Assam, India*

*<sup>2</sup>Department of Chemistry, Indian Institute of Technology Guwahati,  
Guwahati 781039, Assam, India*

\* Correspondence and requests for materials should be addressed to P.S. (Tel: +91-361-2583205, Fax: +91-361-2582249, e-mail: psatpati@iitg.ac.in) and S.C. (Tel: +91-361-2583310, mail: sunanda.c@iitg.ac.in)

## Content

| <b>Sl No.</b> |          | <b>Topic</b>                                                                                        | <b>Page No.</b> |
|---------------|----------|-----------------------------------------------------------------------------------------------------|-----------------|
| 1             | Table S1 | Simulation details for umbrella sampling                                                            | S3              |
| 2             | Table S2 | Sampling and Convergence Simulation of LL-14:SDS system.                                            | S4              |
| 3             | Table S3 | Details of Simulation trial of LL-14:DPC complex.                                                   | S5              |
| 4             | Fig. S1  | Force profile of LL-14:SDS complex at various pulling rates.                                        | S6              |
| 5             | Fig. S2  | Distance between the center-of-mass (COM) of the peptide and the SDS micelle as a function of time. | S7              |
| 6             | Fig. S3  | Umbrella histogram at different salt concentration.                                                 | S7              |
| 7             | Fig. S4  | Ramachandran Plot of LL-14 peptide.                                                                 | S8              |
| 8             | Fig. S5  | Force profile and Potential of mean force (PMF) of LL-14:DPC complex.                               | S9              |

**Table S1:** Simulation setup details for umbrella sampling

|                                      | <b>LL-14:SDS<br/>(NaCl = 0.0% w/v)</b>                 | <b>LL-14:SDS<br/>(NaCl = 0.5% w/v)</b> | <b>LL-14:SDS<br/>(NaCl = 1.0% w/v)</b> |
|--------------------------------------|--------------------------------------------------------|----------------------------------------|----------------------------------------|
| <b>Total no of atoms</b>             | 268833                                                 | 268038                                 | 266918                                 |
| <b>No of Water molecules</b>         | 88649                                                  | 88292                                  | 87925                                  |
| <b>Na<sup>+</sup> ions</b>           | 60                                                     | 198                                    | 338                                    |
| <b>Cl<sup>-</sup> ions</b>           | 7                                                      | 145                                    | 285                                    |
| <b>Molecular Dynamics parameters</b> |                                                        |                                        |                                        |
| time step                            | 0.002 ps                                               |                                        |                                        |
| boundary condition                   | Periodic boundary condition (pbc)                      |                                        |                                        |
| Long range electrostatics            | Particle Mesh Ewald (PME <sup>1</sup> )                |                                        |                                        |
| Short-range neighbour list cut-off   | 1.4 nm                                                 |                                        |                                        |
| Short-range electrostatic cut-off    | 1.4 nm                                                 |                                        |                                        |
| Short-range van der Waals cut-off    | 1.4 nm                                                 |                                        |                                        |
| Constraint algorithm (h-bonds)       | lincs <sup>2</sup>                                     |                                        |                                        |
| Temperature control                  | velocity rescaling algorithm (V-rescale <sup>3</sup> ) |                                        |                                        |
| Pressure control                     | Parrinello-Rahman <sup>4</sup>                         |                                        |                                        |

**References**

- 1 T. Darden, D. York and L. Pedersen, Particle mesh Ewald: An N·log(N) method for Ewald sums in large systems, *J Chem Phys*, 1993, **98**, 10089–10092.
- 2 B. Hess, H. Bekker, H. J. C. Berendsen and J. G. E. M. Fraaije, LINCS: A linear constraint solver for molecular simulations, *J Comput Chem*, , DOI:10.1002/(SICI)1096-987X(199709)18:12<1463::AID-JCC4>3.0.CO;2-H.
- 3 G. Bussi, D. Donadio and M. Parrinello, Canonical sampling through velocity rescaling, *J Chem Phys*, 2007, **126**, 014101.
- 4 M. Parrinello and A. Rahman, Strain fluctuations and elastic constants, *J Chem Phys*, 1982, **76**, 2662–2666.

**Table S2:** No restraint applied for SDS micelle during umbrella Sampling. Run-length (in ns) and estimated binding free energy from each independent replica are given.  $\Delta G^{\text{Averaged}}$  is the average over multiple replicas.  $\Delta\Delta G^{\text{Averaged}} = \Delta G^{\text{Averaged}}(0.5\% \text{ or } 1\% \text{ NaCl}) - \Delta G^{\text{Averaged}}(0\% \text{ NaCl})$ . Total Simulation length = (33745 ns *umbrella sampling* + 120.6 ns *equilibration* + 8 ns *SMD*) = 33873.6 ns  $\sim$  33.87  $\mu$ s. Error is in SEM given after  $\pm$ .

|                                           | Replicas                             | Run-length of Umbrella Sampling                         | $\Delta G$ (kcal/mol)               | $\Delta G^{\text{Averaged}}$ (kcal/mol) | $\Delta\Delta G^{\text{Averaged}}$ (kcal/mol) |
|-------------------------------------------|--------------------------------------|---------------------------------------------------------|-------------------------------------|-----------------------------------------|-----------------------------------------------|
| <b>LL-14:SDS</b><br>(NaCl = <b>0.0%</b> ) | <b>Trial 1</b>                       | 43 windows $\times$ 50 ns<br>= 2150 ns                  | -33.85 $\pm$ 0.97                   | -33.53 $\pm$ 0.86                       | 0.0                                           |
|                                           | <b>Trial 2</b>                       | 43 windows $\times$ 55 ns<br>= 2365 ns                  | -34.15 $\pm$ 1.16                   |                                         |                                               |
|                                           | <b>Trial 3</b><br>(Highest Sampling) | <b>43 windows <math>\times</math> 250 ns = 10750 ns</b> | <b>-33.19 <math>\pm</math> 0.75</b> |                                         |                                               |
| <b>LL-14:SDS</b><br>(NaCl = <b>0.5%</b> ) | <b>Trial 1</b>                       | 43 windows $\times$ 50 ns<br>= 2150 ns                  | -25.58 $\pm$ 0.86                   | -25.61 $\pm$ 0.93                       | -7.92                                         |
|                                           | <b>Trial 2</b>                       | 43 windows $\times$ 55 ns<br>= 2365 ns                  | -25.79 $\pm$ 1.12                   |                                         |                                               |
| <b>LL-14:SDS</b><br>(NaCl = <b>1.0%</b> ) | <b>Trial 1</b>                       | 43 windows $\times$ 50 ns<br>= 2150 ns                  | -21.54 $\pm$ 0.98                   | -21.58 $\pm$ 1.02                       | -11.95                                        |
|                                           | <b>Trial 2</b>                       | 43 windows $\times$ 55 ns<br>= 2365 ns                  | -21.80 $\pm$ 1.16                   |                                         |                                               |

**Alternate Approach\*** In each window, “ $d_{\text{COM}}$ ” and SDS micelle were harmonically restrained, employing a force constant of 1000 kJ mol<sup>-1</sup> nm<sup>-2</sup> relative to the starting coordinate. Snapshots selected from fast pulling simulations, pulling rate = 0.01 nm ps<sup>-1</sup>). In trial 4, umbrella sampling was performed by choosing the snapshots from a slow pull (pulling rate = 0.005 nm ps<sup>-1</sup>) simulation. The SDS micelle was modelled as an immobile reference (restrained) during the umbrella sampling simulations.

| <b>Alternate Approach*</b>                | Replicas                                   | Run-length of Umbrella Sampling        | $\Delta G$ (kcal/mol) | $\Delta G^{\text{Averaged}}$ (kcal/mol) | $\Delta\Delta G^{\text{Averaged}}$ (kcal/mol) |
|-------------------------------------------|--------------------------------------------|----------------------------------------|-----------------------|-----------------------------------------|-----------------------------------------------|
| <b>LL-14:SDS</b><br>(NaCl = <b>0.0%</b> ) | <b>Trial 1</b>                             | 43 windows $\times$ 10 ns<br>= 430 ns  | -61.95 $\pm$ 0.95     | -61.09 $\pm$ 0.85                       | 0.0                                           |
|                                           | <b>Trial 2</b>                             | 43 windows $\times$ 50 ns<br>= 2150 ns | -60.09 $\pm$ 0.88     |                                         |                                               |
|                                           | <b>Trial 3</b>                             | 43 windows $\times$ 10 ns<br>= 430 ns  | -61.03 $\pm$ 0.97     |                                         |                                               |
|                                           | <b>Trial 4</b><br>( <i>Slow Pull SMD</i> ) | 44 windows $\times$ 10 ns<br>= 440 ns  | -61.29 $\pm$ 0.93     |                                         |                                               |
| <b>LL-14:SDS</b><br>(NaCl = <b>0.5%</b> ) | <b>Trial 1</b>                             | 43 windows $\times$ 10 ns<br>= 430 ns  | -46.14 $\pm$ 0.52     | -46.04 $\pm$ 0.45                       | -15.04                                        |
|                                           | <b>Trial 2</b>                             | 43 windows $\times$ 50 ns<br>= 2150 ns | -45.94 $\pm$ 0.44     |                                         |                                               |

|                                          |                |                                 |               |               |        |
|------------------------------------------|----------------|---------------------------------|---------------|---------------|--------|
| <b>LL-14:SDS</b><br><b>(NaCl = 1.0%)</b> | <b>Trial 1</b> | 43 windows × 10 ns<br>= 430 ns  | -42.58 ± 0.49 | -42.34 ± 0.32 | -18.77 |
|                                          | <b>Trial 2</b> | 43 windows × 50 ns<br>= 2150 ns | -42.09 ± 0.31 |               |        |

The absolute value of estimated free energies ( $\Delta G$ ) was strongly dependent on the adopted approach (Restrained or unrestrained SDS micelle). However, the salt-induced systematic change in the binding affinity, disfavoring LL-14 binding to SDS micelle, was a robust feature independent of the adopted approach.

**Table S3:** LL-14:DPC micelle binding free energy estimated from umbrella sampling (Approach 2: No restraint on the DPC micelle, Snapshot selected from COM pull rate = 0.01 nm/ps). SEM given after  $\pm$ .

| <b>Approach 2</b>                        | Replicas       | Run-length of Umbrella Sampling | $\Delta G$ (kcal/mol) |
|------------------------------------------|----------------|---------------------------------|-----------------------|
| <b>LL-14:DPC</b><br><b>(NaCl = 0.0%)</b> | <b>Trial 1</b> | 42 windows × 20 ns<br>= 840 ns  | -11.58 ± 0.98         |

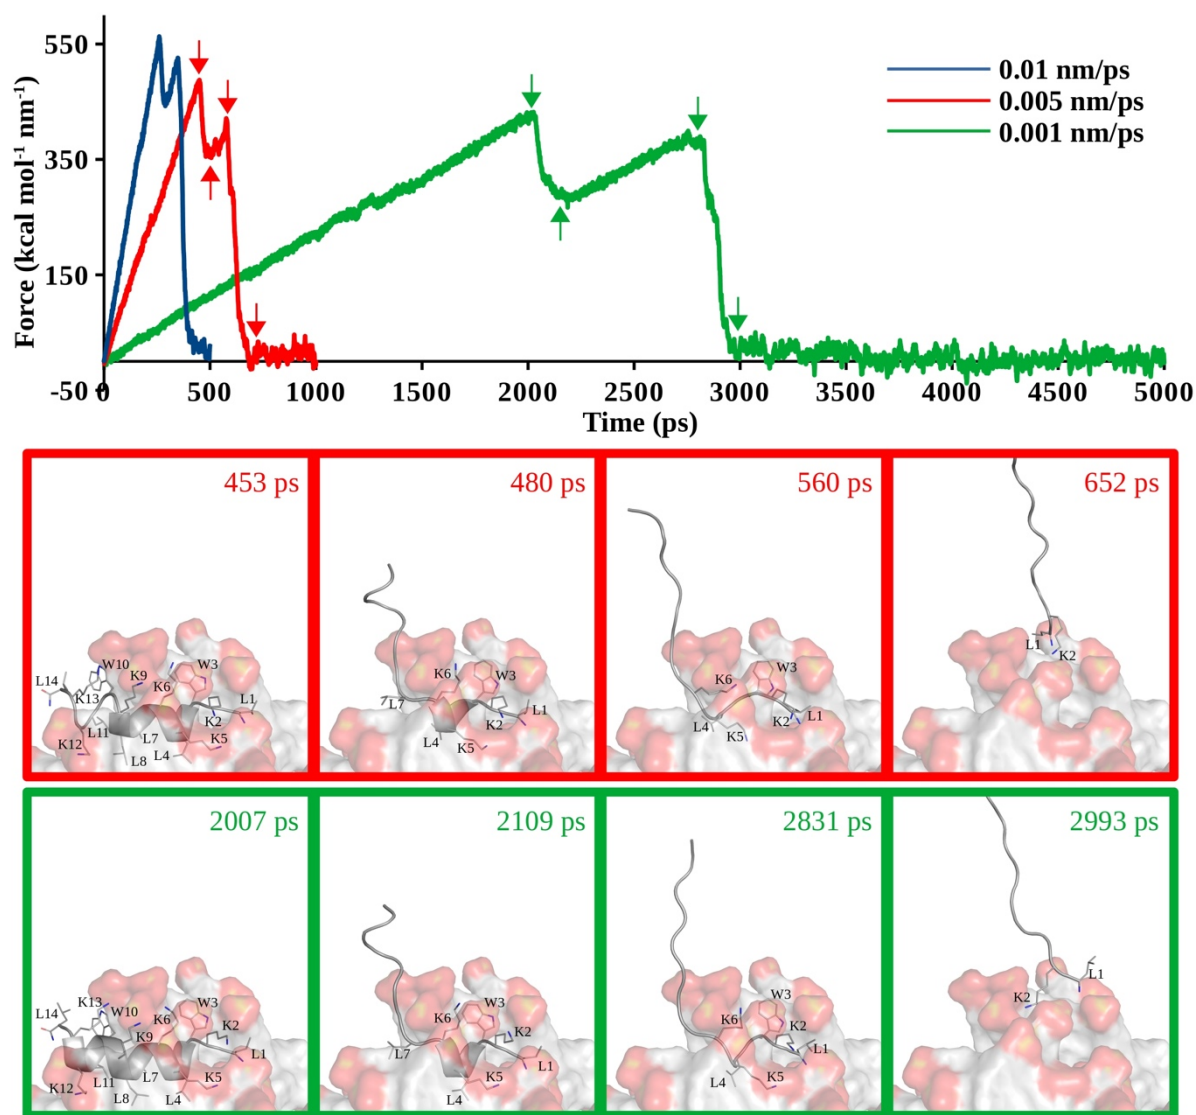

**Fig. S1** Force versus time plots from various SMD simulations (pull rates = 0.01nm/ps, 0.005 nm/ps, and 0.001 nm/ps). The shape of the force profile was independent of the pull rates. Structures from various time-points shown in the boxes (**red** : 0.005 nm/ps pull-rate, **green** : 0.001 nm/ps pull-rate).

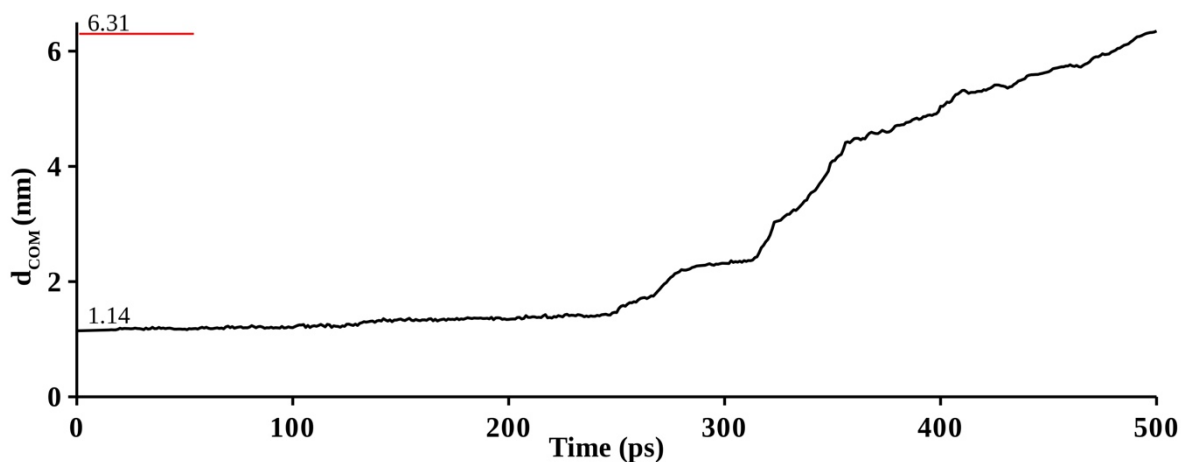

**Fig. S2** Center-of-mass pulling simulation ( $d_{\text{COM}}$  vs. time plot, pulling rate = 0.01 nm/ps).  $d_{\text{COM}}$  = Distance between the center-of-mass of the LL-14 and SDS micelle. “ $d_{\text{COM}}$ ” range (Minimum = 1.14 nm, Maximum = 6.31nm).

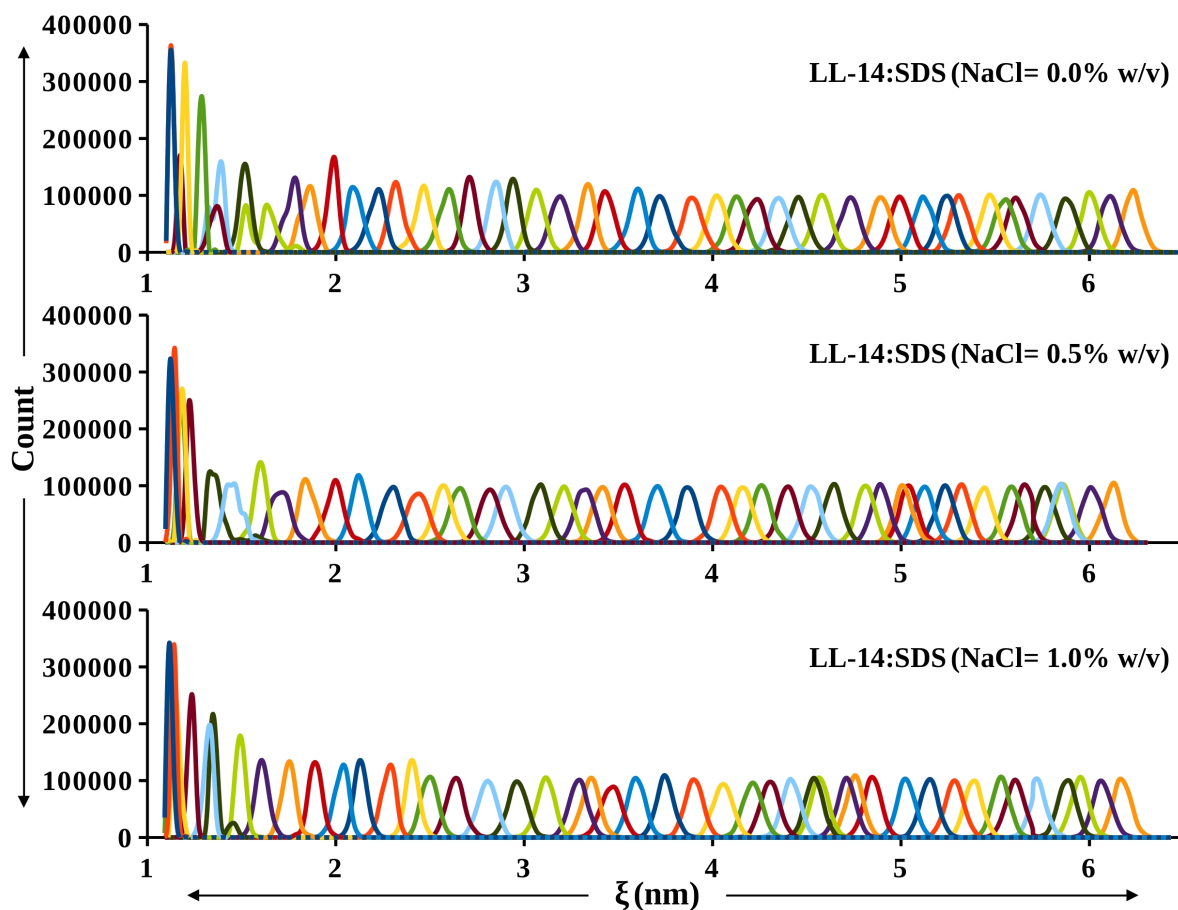

**Fig. S3** Probability distribution at each umbrella sampling window (Total windows = 43, shown in different colours) from the LL-14:SDS PMF profile at various salt-concentrations (NaCl = 0%, 0.5%, and 1.0% w/v). The overlap of probability distribution (between two neighbouring windows) was evident.

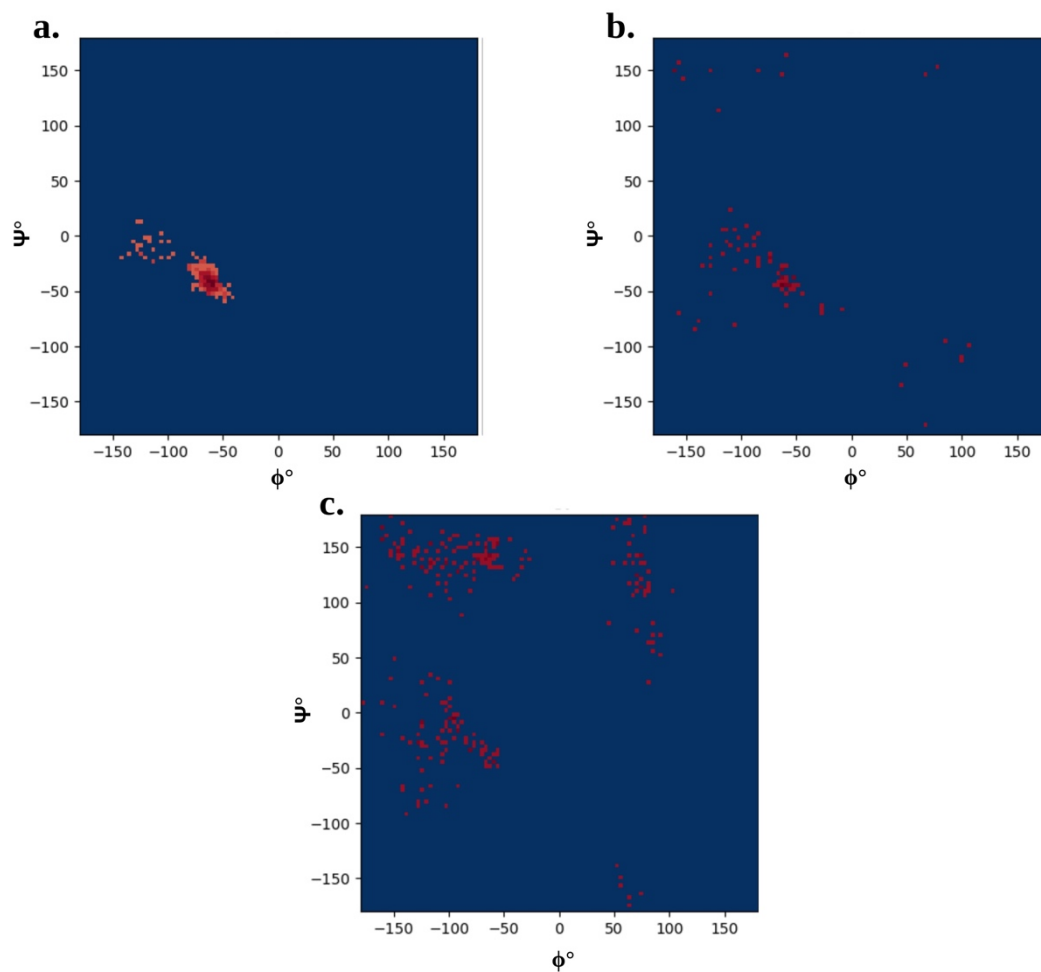

**Fig. S4** Ramachandran Plot of LL-14 peptide obtained from different trajectory segment during the centre-of-mass pulling (SMD, pull rate= 0.01 nm/ps, NaCl = 0% w/v). SMD trajectory segment (a) 0 - 263 ps, (b) 264 – 351 ps, and (c) 352 - 500 ps.  $\phi$  and  $\Psi$  angles were plotted from  $-180^\circ$  to  $180^\circ$ . Dispersion of red points from “a”  $\rightarrow$  “c” indicates helical  $\rightarrow$  random-coil transition. Blue regions exhibit either zero or little likelihood of the peptide adopting such a conformation.



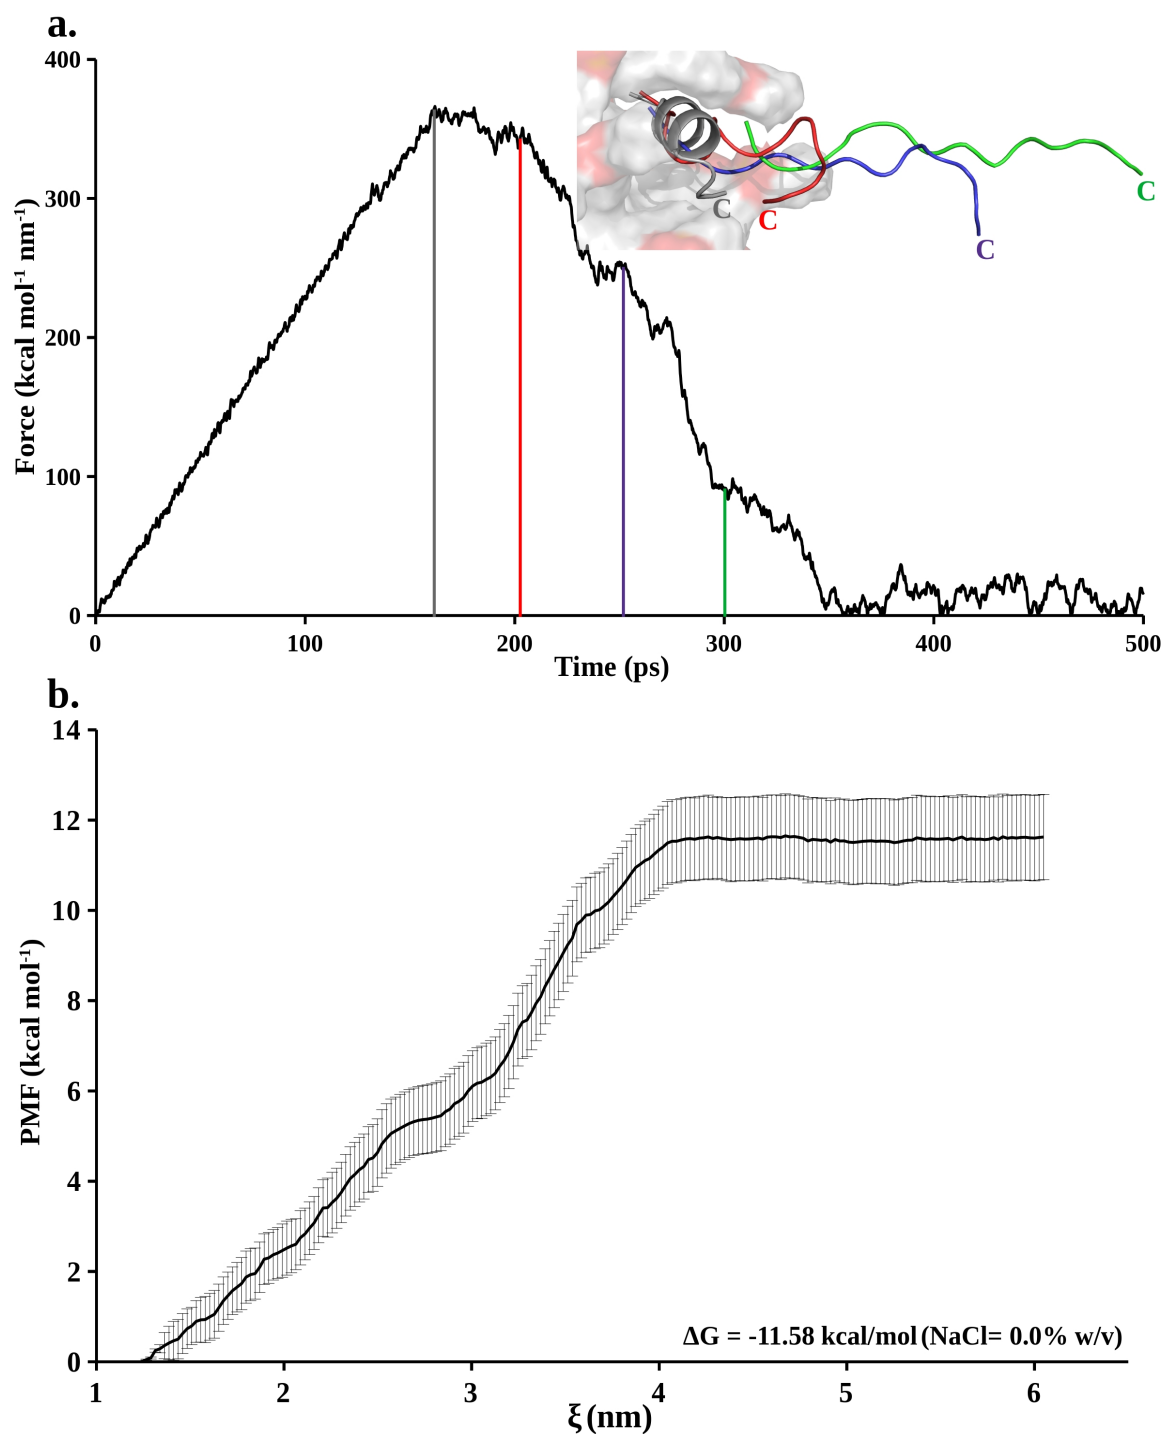

**Fig. S5** (a) Force vs. time plots of LL-14:DPC micelle complex (pull rate 0.01nm/ps, NaCl = 0% w/v). Structures at different time-points (grey, red, blue, and green) were overlaid (shown in surface-cartoon representations). (b) LL-14:DPC binding free energy ( $\Delta G$ ) estimated from the potential of mean force (PMF) versus reaction coordinate “ $\xi$ ” plot. Simulation details were given in Table S3.
